# Supplementary material
Source: Research Square preprint supplement (doi:10.21203/rs.3.rs-8968112/v1)
Supplement: Supplementary file 1 [file 62dbe80d8cabc2b58e1e54f4.docx]

| Author, year | Country; Study Design | Mean Age/  Age range (yrs) | Sample Size | Study period | Inclusion Criteria | Methods of validated unified exposition | Data Source/  Study Database | Adjustment for Covariates |
| --- | --- | --- | --- | --- | --- | --- | --- | --- |
| *Ashbury et al. 2010* | Canada; Population-based case-control study | 28-79 | 1701 BC cases, 17017 controls | 2003 - 2006 | Women aged 28-79 during the period 2003-2006; Continuous outpatient prescription drug coverage for ≥10 years before index date; No previous cancer diagnosis (except non-melanoma skin cancer or in situ cervical cancer); All incident cases of primary invasive breast cancer (diagnosed between 2003-2006) | One or more prescriptions of AD | Three administrative health databases from the province of Saskatchewan (SK), Canada: (1) the person registry system(PRS) (population registry) for information on demographics and dates of health coverage for the majority of SK residents, (2) the Saskatchewan prescription drug plan (SPDP) database for all outpatient prescriptions covered by the drug plan filled since the mid-1970’s for most SK residents, and (3) the Saskatchewan Cancer Agency (SCA) cancer registry database for detailed information on cancer diagnoses since 1970. | Age at index (years), marital status, income support status, residence status, and use of oral contraceptives and/or use of hormone therapy. |
| *Azoulay et al. 2011* | UK; Population-based cohort study | 66.9 | BC cases 1237, controls 11625 | January 1, 1988 and December 31, 2007 | Females aged ≥18 years; At least one antipsychotic prescription during 1988-2007 study period; At least 1 year of “up to standard” medical history before first prescription (or cohort entry postponed to ensure 1 year history) | Prescriptions dispensed by GPRD | General Practice Research Database (GPRD) | Obesity (BMI>30), smoking history(ever or never), alcohol consumption(according to medical code), medical commorbidities, hormone replacement therapy |
| *Boursi et al. 2015* | UK; Case-control study | 62.8 | 31352 BC cases, 123285 controls | 1995-2013 | All people receiving medical care from 1995 to 2013 froma THIN practitioner were eligible for inclusion. | One or more prescriptions of AD | Database (Health Improvement Network) | Reference date and county of residence using logistic regression. |
| *Brown et al. 2015* | USA; Prospective cohort study | 50-79 | BC cases 3171, controls 68268 | October 1, 1993 - December 31, 1998 | Postmenopausal women aged 50-79, intent to remain in area ≥3 yrs, enrolled 1993-1998 | In-person interviews by trained registered nurses; standardized questionnaire and medication brought to clinic; depressive symptoms via validated scale | WHI-OS via BioLINCC | Reference date and county of residence using logistic regression. |
| *Chien et al. 2005* | USA; Case-control study | 65-79 | 975 BC, 1007 controls | 1997-1999 | Women aged 65-79 years; Diagnosed with invasive breast cancer between 1997-1999; Must have CMS (Medicare) record for inclusion Controls: frequency-matched on age, year, county of residence | Structured nurse-administered in-person interview to which participants were instructed to bring medication bottles/packaging for drugs taken | The Cancer Surveillance System(CSS), a population-based tumor registry that serves the Seattle-Puget Sound region of Washington State and participates in the Surveillance, Epidemiology, and End Results (SEER) program of the National Cancer Institute. Controls without breast cancer were randomly selected from Centre for Medicare and Medicaid Service (CMS) records | Age (5-year groups), study center (New York, Philadelphia, Boston), and year of interview (1998-1990, 1991-1992, 1993-1996, 1997-2002), alchol consumption (former, current,never), religion (Catholic, Jewish, Protestant, other), family history of breast cancer (yes, no), and race (White, other). |
| *Chubak et al. 2008* | USA; Retrospective cohort study | ≥18 | BC cases: 4216 | 1990-2008 | Women ≥18 years, with stage I-II first primary invasive breast cancer, enrolled in Group Health before and after diagnosis | Pharmacy records and EMR data | Group Health electronic medical records, pharmacy data, SEER registry | Age, clinical depression, benign proliferative breast disease (and age at menopause for selective serotonin reuptake inhibitors (SSRIs)); MAOI, monoamine oxidase inhibitor. |
| *Coogan et al. 2005* | USA; Case-control study | 25-79 | 2138 BC cases, 2858 controls | 1988-2002 | Women aged 18-79 admitted to participating hospitals living in eligible ZIP codes (≤50 miles from study hospitals); Able to complete interview; For cases: diagnosed with first primary invasive breast cancer within previous year | Structured nurse-administered in-person interview to which participants were instructed to bring medication bottles/packaging for drugs taken | The Cancer Surveillance System(CSS), a population-based tumor registry that serves the Seattle-Puget Sound region of Washington State and participates in the Surveillance, Epidemiology, and End Results (SEER) program of the National Cancer Institute. Controls without breast cancer were randomly selected from Centers for Medicare and Medicaid Service (CMS) records | Age, length of enrollment, calendar year, family history of breast cancer, parity/age at first birth, durationof HRT use, body mass index, and history of screening mammogram in 2 years prior to reference date |
| *Coogan et al. 2008* | USA; Case-control study | 24-74 | 820 BC invasive cases, 2852 controls | 1990 - 2006 | Women aged 18-79; Admitted to participating hospitals living in eligible ZIP codes (≤50 miles from study hospitals); Able to complete interview; For cases: diagnosed with first primary invasive breast cancer within previous year | Structured nurse-administered in-person interview to which participants were instructed to bring medication bottles/packaging for drugs taken | Primary data collection via hospital admission logs, ward logs, and interviews; Diagnosis confirmed via discharge summaries and pathology reports | Age, calendar year, BMI, alcohol consumption, prior benign breast disease, depression, NSAID use, HRT use |
| *Cotterchio et al. 2000* | Canada; Population-based case-control study | 25-74 | 701 BC cases, 702 controls | 1995-1996 | Women aged 25-74 years, diagnosed with pathology-confirmed primary breast cancer during 1995-1996; controls randomly sampled from property assessment rolls and frequency-matched by 5-year age group. | Self-administered structured questionnaire sent by mail. Women were asked if they had ever used antidepressants for ≥2 weeks. If yes, they provided the name, start and stop dates, and duration for each use period. Follow-up included postcards, repeat mailings, and telephone clarification. | National Enhanced Cancer Surveillance Study, Ontario, Canada; data collected through mailed questionnaires with follow-up by phone when needed. | Age, year of diagnosis, menopausal status, county, stage, grade, surgery, chemotherapy, use of other CYP2D6-interfering drugs |
| *Fulton-Kehoe et al. 2006* | USA; Case-control study | 30-79 | 2904 BC cases, 14396 controls | 1990- 2001 | Female GHC enrollees aged 30-79; Continuous GHC enrollment for ≥4 years; diagnosed with first primary invasive or in situ breast cancer between 1990-2001 | Exposure confirmed through electronic pharmacy dispensing records (GHC database), with criteria of ≥2 prescriptions within 6 months to be considered a user. | Group Health Cooperative (GHC) pharmacy database GHC Breast Cancer Screening Program (BCSP) Seattle-Puget Sound SEER cancer registry (USA) | Matching factors (age, year of DCIS, treatment, histology, grade, county, etc.); + endocrine therapy; family history (stratified) |
| *González-Pérez et al. 2005* | UK; Retrospective cohort study with a secondary nested case-control study | 30-79 | 3708 BC cases, 20000 controls | 1995-2001 | Women aged 30 to 79 years; At least 1 year of registration with the general practitioner; At least 1 year since first computerized prescription; No recorded cancer diagnosis before the study start date | Exposure was confirmed through electronic prescription records from the General Practice Research Database (GPRD). All prescriptions were electronically issued by general practitioners and recorded systematically. | General Practice Research Database (GPRD), UK | Age, race, age at menarche, age at first full-term pregnancy, breastfeeding, menopausal status, family history of breast cancer, oral contraceptive use, hormone replacement therapy, education level, BMI, waist-to-hip ratio, alcohol use, smoking history |
| *Haque et al. 2005* | USA; Retrospective cohort study | ≥18 | BC cases 635, controls 108369 | 1995-2000 | Female health plan members with at least one qualifying episode of antidepressant use, no use of that antidepressant in prior 6 months | Computerized pharmacy records | KPSC health plan records; pharmacy computerized data; KPSC cancer registry; California death certificate master file | Age, height, body mass index, age at menarche, parity, age at menopause, oral contraceptive use, alcohol consumption, family history of breast cancer, history of benign breast disease, clinical depression, and anxiety. |
| *Haukka et al. 2010* | Finland; Retrospective cohort study | NA | BC cases 19365 among 837176 people and controls 418588 | 1998-2005 | ≥1 AD prescription from 1998-2005; no AD in 1995-1997; no cancer before AD use | Central prescription register tracking filled prescriptions (DDD); register linkage for confirmation | Social Insurance Institution (prescriptions), Finnish Cancer Registry (cancer), Statistics Finland (death) | Age, sex, treatment type (surgery, chemo, radiotherapy) |
| *Kato et al. 2000* | USA; Prospective cohort study | NA | BC cases 566, control 15270 | 1985-1991 | Women not using hormonal medications and not pregnant in previous 6 months at enrollment | Medication use assessed via baseline self-administered questionnaire (4-week recall); cancer diagnoses confirmed via medical records, state cancer registries, and National Death Index; follow-up completeness ~94%. | New York University Women’s Health Study (NYUWHS) | Age at reference date, year of interview, parity, age at first live birth, body mass index at reference date, family history of breast cancer, menopausal status, age at menopause, history of mammography (annual mammogram each year in the last 5 years), and type of hormone use |
| *Kelly et al. 1999* | USA; Case-control study | 18-69 | 5814 BC cases, 5095 cancer controls and 5814 non cancer controls | 1977-1996 | Women aged 18-69 years admitted to participating hospitals; cases: new primary invasive breast cancer diagnosed in previous year | Structured hospital interview using a questionnaire administered by trained nurses; lifetime drug use history collected | Hospital-based surveillance system in Boston, New York, Baltimore, and Philadelphia | Age (mean and standard deviation), duration of follow-up (mean and standard deviation), excessive alcohol use, body mass index (categorized as <30 and ≥30), smoking status (ever vs. never smokers), use of medications (aspirin, selective serotonin reuptake inhibitors, statins, insulin, metformin, and other oral hypoglycemic agents), history of previous cancer, hypertension, oophorectomy, hormone replacement therapy, and oral contraceptive use. |
| *Lash et al. 2010* | Denmark; Case-control study | 35-69 | 366 BC which 37 BC recurrences, 366 controls | 1994-2006 | Women aged 35-69 with stage I-III primary breast cancer, diagnosed 1994-2001, reported to DBCG, alive and recurrence-free for 1 year | One or more prescriptions of AD registered by national prescription registry, CPR linkage | DBCG registry, Statistics Denmark prescription registry and civil registration system | Age |
| *Mansi et al. 2022* | USA; Case-control study | 30-79 | 337 BC cases, 592 controls | 1995-2013 | Women aged 30-79 with DCIS between Jan 1995-Jun 2013; antidepressant data available | Medical records and interviews with professional sanitary workers | SEER registry (13 counties, Washington) + interviews + med records | Age, BMI (Quetelet index), age at menarche, menopausal status, parity, family history of breast cancer |
| *Moorman et al. 2003* | USA; Case-control study | 20-74 | 938 invasive BC and 771 controls; 507 BC in situ cases and 455 controls | 1993-2000 | Women aged 20-74 years, residents of study area, no prior breast cancer | In-person interviews by trained registered nurses; standardized questionnaire; memory aids including visual prompts of antidepressant drugs and indications | Carolina Breast Cancer Study (CBCS) | Age, region, race, religion, interview year, age at menarche, age at first birth, BMI, benign breast disease, menopausal status, family history of breast cancer, alcohol consumption, lifetime hospitalisations |
| *Sharpe et al. 2022* | Canada; Nested case-control study | 50-79 | BC cases 5882, controls 23517 | 1981-1995 | Women 5+ years eligible for drug plan, no cancer history (except NMSC or CIS cervix), age 18-35 in 1981 | Exposure was confirmed through electronic prescription records from the national Database. All prescriptions were electronically issued by general practitioners and recorded systematically. | Saskatchewan Prescription Drug Plan & Saskatchewan Cancer Agency | Age, sex, calendar time, use of other drugs (estrogens, contraceptives, NSAIDs), exposure in other periods |
| *Steingart et al. 2003* | Canada; Population-based case-control study | 25-74 | 3133 BC cases, 3062 controls | June 1996 - May 1998 | Cases: Women aged 25-74 years Diagnosed with first primary breast cancer between June 1996 and May 1998 Ontario residents and alive at time of recruitment; Controls: Women aged 25-74 years Never diagnosed with breast cancer Ontario residents and alive Selected from Ontario Ministry of Finance assessment rolls | Exposure to antidepressants was self-reported using a structured, pre-tested 21-page questionnaire, which included visual aids (color pill photographs) to help identify medications. Additional follow-up (postcards, phone calls) was conducted to confirm and complete the information provided. | Self-administered questionnaire supplemented with Ontario Cancer Registry (OCR) for case identification | Effects of exposure during the other periods |
| *Tamim et al. 2006* | Canada; Nested case-control study | 20-83 | BC cases7330, 2920 controls | 1981-2000 | Age 18-82.5, resident in Saskatchewan, covered by drug plan ≥5 years before index date, no cancer history (except NMSC and cervical CIS) | Exposure was confirmed through electronic prescription records from the national Database. All prescriptions were electronically issued by general practitioners and recorded systematically. | Saskatchewan Health Drug Plan, Saskatchewan Cancer Registry | Age, BMI, alcohol, smoking, physical activity, parity, age at first birth, breastfeeding, oophorectomy, PMH use, age at menopause, race, AD use (for depression analysis) and vice versa |
| *Wang et al. 1996* | USA; Retrospective cohort study | ≥ 20 | BC cases 319 among 38273 AD users and 252 cases among 32949 non-AD users | January 1, 1989 - June 30, 1991 | Women ≥20 years; Filled at least one antidepressant prescription (exposed) or a non-AD prescription (non-exposed); Continuous health service claims over the 6-month pre-index period Enrollment in Medicaid or PAAD | Prescription data came from linked pharmacy records in Medicaid/PAAD databases | New Jersey Medicaid PAAD, Medicare New Jersey Cancer Registry | Age, year, stage, ER/PR status, surgery type, chemotherapy, endocrine therapy, BMI, smoking, menopausal status, Charlson comorbidity score (all categorical; some time-varying) |
| *Weiss et al. 1998* | USA; Nested case-control study | 20-80 | 1467 cancers which 82 BC recurrences | 1988-1994 | ≥2 years KPNW enrollment before diagnosis, eligible for drug benefits, no prior tumors (except CIS cervix or NMSC) | Pharmacy records, confirmed filled prescriptions | KPNW pharmacy and tumor registry databases | Sex, age group, calendar time, cumulative exposure (DDD), AD type, follow-up time (also tested interactions) |
| *Wernli et al. 2009* | USA; Population-based case-control study | 20-69 | 4021 BC cases, 4500 controls | 2003-2006 | Female residents aged 20-69 years. Cases: Diagnosed with incident invasive breast cancer during 2003-2006, with valid telephone and driver’s license. Controls: Women with driver’s license and publicly available phone number, frequency matched by age. | Exposure to antidepressants was assessed by trained interviewers through structured telephone interviews. Information collected on medication name, duration, frequency, start and stop years, and reasons for last use (in subsample).Only exposures occurring at least 1 year prior to reference date were considered. Reference date for controls assigned to mirror time from diagnosis to interview in cases (by age group), maintaining blinding and comparability. | Wisconsin statewide tumor registry for cases. Licensed driver lists for controls. Telephone interviews administered by trained personnel. | Demographics: age, race, socioeconomic status (Medicaid vs PAAD) Medical conditions: Charlson Comorbidity Index, benign breast disease, obesity, alcohol abuse Medications: estrogen exposure Healthcare utilisation: number of physician visits, hospital/nursing home days Other: history of malignancies, depression |
