# Supplementary material
Source: Research Square preprint supplement (doi:10.21203/rs.3.rs-8968112/v1)
Supplement: Supplementary file 2 [file f00a23e507fe9f2994156a83.docx]

|  | *Selection* | | | | *Comparability* | *Outcome* | | |  |
| --- | --- | --- | --- | --- | --- | --- | --- | --- | --- |
| *Author* | ***Representativeness*** | ***Selection*** | ***Selection of controls*** | ***Definition of controls*** | ***Variables(s)*** | ***Ascertainment of exposure*** | ***Same method of ascertainment for cases and controls*** | ***Non-response rate*** | ***Overall*** |
| Ashbury et al. | * | * | * |  | ** | * |  |  | 6 |
| Azoulay et al. | * | * | * |  | * |  | * |  | 5 |
| Boursi et al. | * | * | * | * | * |  |  | * | 6 |
| Brown et al. | * | * |  | * | ** | * | * |  | 7 |
| Chien et al. | * | * | * | * | * | * |  |  | 6 |
| Chubak et al. | * | * | * |  | * |  | * |  | 5 |
| Coogan et al. 2005 | * | * |  | * | ** | * |  |  | 6 |
| Coogan et al. 2008 | * | * |  | * | ** |  | * |  | 6 |
| Cotterchio et al. | * | * | * |  | ** | * |  |  | 6 |
| Fulton-Kehoe et al. | * | * | * |  | ** | * |  |  | 6 |
| González-Pérez et al. | * | * | * | * | ** | * |  |  | 7 |
| Haque et al. | * | * | * | * | * | * | * |  | 7 |
| Haukka et al. | * | * | * | * | * | * |  |  | 6 |
| Kato et al. | * | * |  | * | ** | * | * |  | 7 |
| Kelly et al. | * | * |  | * | ** | * |  |  | 6 |
| Lash et al. | * | * | * |  | * | * | * |  | 6 |
| Mansi et al. | * | * | * |  | * | * | * |  | 6 |
| Moorman et al. | * | * | * |  | * | * |  |  | 5 |
| Sharpe et al. | * | * | * |  | * | * | * |  | 6 |
| Steingart et al. | * | * | * | * | ** | * |  |  | 7 |
| Tamim et al. | * | * | * | * | * | * |  |  | 6 |
| Wang et al. | * | * | * | * | ** | * |  |  | 7 |
| Weiss et al. | * | * | * |  | * | * | * |  | 6 |
| Wernli et al. | * | * | * |  | ** |  | * |  | 6 |

**Supplementary Table .** Quality assessment for studies using the Newcastle–Ottawa Quality Assessment Scale: cohort studies and case-control studies.

NOTE: For each study, a maximum of one star for each numbered item within the Selection and Exposure categories was awarded. A maximum of two stars was given for Comparability. The total number of stars earned (maximum score of 9) was a measure of study quality.

The Newcastle–Ottawa Scale (NOS) was used to assess the quality of the included studies. For case–control studies, stars are awarded within the Selection domain when the case definition is adequately validated, cases are representative, community controls are used, and controls have no history of the outcome. In the Comparability domain, one star is given if analyses are adjusted for breast cancer and an additional star if further confounders are controlled. In the Exposure domain, stars are assigned for secure ascertainment of exposure (e.g., medical or surgical records), blinded interviews, consistent methods of exposure assessment between cases and controls, and similar response rates. For cohort studies, the Selection domain awards stars when the exposed cohort is representative of the average population, the nonexposed cohort is drawn from the same community, exposure is ascertained from secure records or structured interviews, and the outcome is absent at baseline. In the Comparability domain, one star is given if analyses adjust for breast cancer and an additional star if further confounders are included. In the Outcome domain, stars are awarded for independent or record-based outcome assessment, sufficient length of follow-up, and adequate follow-up of the cohort. Higher numbers of stars indicate better methodological quality.
